# Supplementary material for: Hot exciton transition for organic light-emitting diodes: tailoring excited-state properties and electroluminescence performances of donor–spacer–acceptor molecules
Source: Royal Society of Chemistry journal article supplement (doi:10.1039/c8ra07891b), 2018-01-01
Supplement: c8ra07891b1.pdf [file c8ra07891b1.pdf]

## Supporting information

**Hot excitation transition for organic light-emitting diodes: Tailoring excited-state properties and electroluminescence performances of donor-spacer-acceptor molecules**

**Jayaraman Jayabharathi\*, Sekar Panimozhi, Venugopal Thanikachalam**

*Department of Chemistry, Annamalai University, Annamalainagar 608 002, Tamilnadu, India*

\* Tel: +91 9443940735; *E-mail address:* jtchalam2005@yahoo.co.in.

## Contents

**SI-I: Charge-Transfer indexes**

**SI-XVII: Figures**

**SI-X: Tables**

### SI-I: Charge-Transfer indexes

The hole-particle pair interactions have been related to the distance covered during the excitations one possible descriptor  $\Delta r$  index could be used to calculate the average distance which is weighted in function of the excitation coefficients.

$$\Delta r = \frac{\sum_{ia} k_{ia}^2 |\langle \varphi_a | r | \varphi_a \rangle - \langle \varphi_i | r | \varphi_i \rangle|}{\sum_{ia} K_{ia}^2} \dots\dots\dots (S1)$$

where  $|\langle \varphi_i | r | \varphi_i \rangle|$  is the norm of the orbital centroid [1-4].  $\Delta r$ -index will be expressed in Å.

The density variation associated to the electronic transition is given by

$$\Delta \rho(r) = \rho_{EX}(r) - \rho_{GS}(r) \dots\dots\dots (S2)$$

where  $\rho_{GS}(r)$  and  $\rho_{EX}(r)$  are the electronic densities of to the ground and excited states, respectively. Two functions,  $\rho_+(r)$  and  $\rho_-(r)$ , corresponds to the points in space where an increment or a depletion of the density upon absorption is produced and they can be defined as follows:

$$\rho_+(r) = \begin{cases} \Delta \rho(r) & \text{if } \Delta \rho(r) > 0 \\ 0 & \text{if } \Delta \rho(r) < 0 \end{cases} \dots\dots\dots (S3)$$

$$\rho_-(r) = \begin{cases} \Delta \rho(r) & \text{if } \Delta \rho(r) < 0 \\ 0 & \text{if } \Delta \rho(r) > 0 \end{cases} \dots\dots\dots (S4)$$

The barycenters of the spatial regions  $R_+$  and  $R_-$  are related with  $\rho_+(r)$  and  $\rho_-(r)$  and are shown as

$$R_+ = \frac{\int r \rho_+(r) dr}{\int \rho_+(r) dr} = (x_+, y_+, z_+) \dots\dots\dots (S5)$$

$$R_- = \frac{\int r \rho_-(r) dr}{\int \rho_-(r) dr} = (x_-, y_-, z_-) \dots\dots\dots (S6)$$

The spatial distance ( $D_{CT}$ ) between the two barycenters  $R_+$  and  $R_-$  of density distributions can thus be used to measure the CT excitation length

$$D_{CT} = |R_+ - R_-| \dots\dots\dots (S7)$$

The transferred charge ( $q_{CT}$ ) can be obtained by integrating over all space  $\rho_+$  ( $\rho_-$ ),. Variation in dipole moment between the ground and the excited states ( $\mu_{CT}$ ) can be computed by the following relation:

$$\|\mu_{CT}\| = D_{CT} \int \rho_+(r) dr = D_{CT} \int \rho_-(r) dr \dots\dots\dots (S8)$$

$$= D_{CT} q_{CT} \dots\dots\dots (S9)$$

The difference between the dipole moments  $\|\mu_{CT}\|$  have been computed for the ground and the excited states  $\Delta\mu_{ES-GS}$ . The two centroids of charges ( $C^+/C^-$ ) associated to the positive and negative density regions are calculated as follows. First the root-mean-square deviations along the three axis ( $\sigma_{aj}$ ,  $j = x, y, z$ ;  $a = +$  or  $-$ ) are computed as

$$\sigma_{a,j} = \sqrt{\frac{\sum_i \rho_a(r_i) (j_i - j_a)^2}{\sum_i \rho_a(r_i)}} \dots\dots\dots (S10)$$

The two centroids ( $C_+$  and  $C_-$ ) are defined as

$$C_+(r) = A_+ e \left( \frac{(x - x_+)^2}{2\sigma_{+x}^2} - \frac{(y - y_+)^2}{2\sigma_{+y}^2} - \frac{(z - z_+)^2}{2\sigma_{+z}^2} \right) \dots\dots\dots (S11)$$

$$C_-(r) = A_- e \left( \frac{(x - x_-)^2}{2\sigma_{-x}^2} - \frac{(y - y_-)^2}{2\sigma_{-y}^2} - \frac{(z - z_-)^2}{2\sigma_{-z}^2} \right) \dots\dots\dots (S12)$$

The normalization factors ( $A_+$  and  $A_-$ ) are used to impose the integrated charge on the centroid to be equal to the corresponding density change integrated in the whole space:

$$A_+ = \frac{\int \rho_+(r) dr}{\int e^{-\left(\frac{(x-x_-)^2}{2\sigma_{+x}^2} + \frac{(y-y_-)^2}{2\sigma_{+y}^2} + \frac{(z-z_-)^2}{2\sigma_{+z}^2}\right)} dr} \dots\dots\dots (S13)$$

$$A_- = \frac{\int \rho_-(r) dr}{\int e^{-\left(\frac{(x-x_-)^2}{2\sigma_{-x}^2} + \frac{(y-y_-)^2}{2\sigma_{-y}^2} + \frac{(z-z_-)^2}{2\sigma_{-z}^2}\right)} dr} \dots\dots\dots (S14)$$

H index is defined as half of the sum of the centroids axis along the D–A direction, if the D–A direction is along the X axis, H is defined by the relation:

$$H = \frac{\sigma_{+x} + \sigma_{-x}}{2} \dots\dots\dots (S15)$$

The centroid along X axis is expected. The t index represents the difference between  $D_{CT}$  and H:

$$t = D_{CT} - H \dots\dots\dots (S16)$$

## SI- XVII: Figures

**Figure S1.**  $^1\text{H}$  NMR spectrum of 4'-(1-(naphthalen-1-yl)-1H-phenanthro[9,10-d]imidazol-2-yl)-N,N-diphenyl-(2-[1,1'-biphenyl]vinyl)-4-amine (NSPI-TPA)

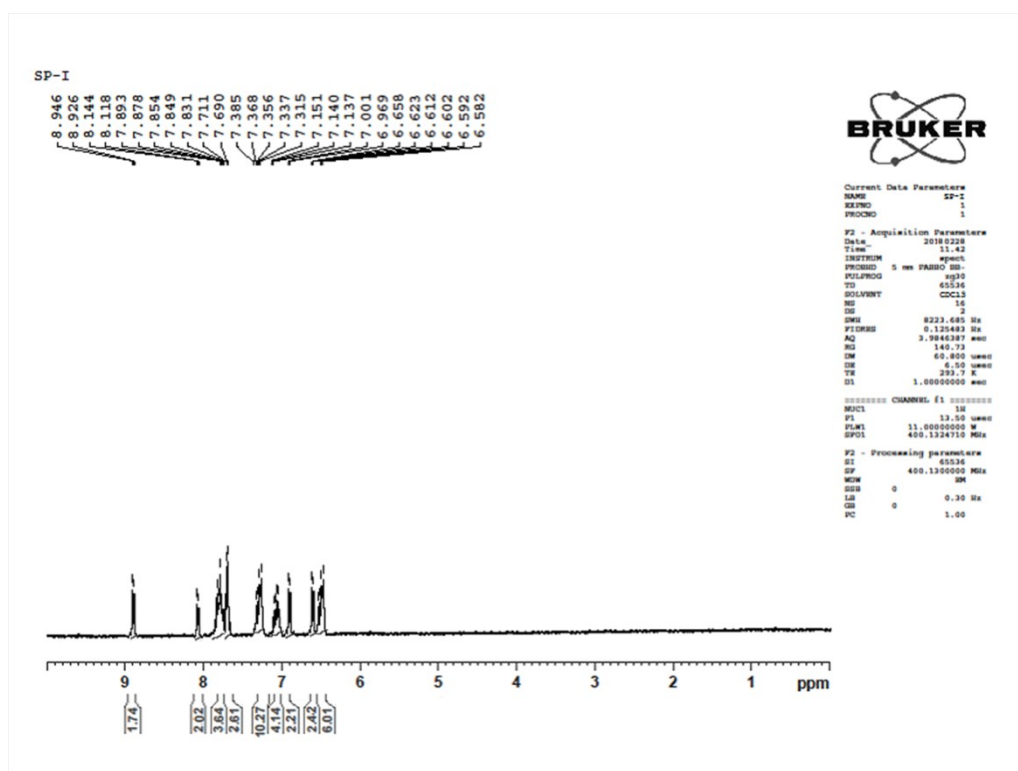

**Figure S2.**  $^{13}\text{C}$  NMR spectrum of 4'-(1-(naphthalen-1-yl)-1H-phenanthro[9,10-d]imidazol-2-yl)-N,N-diphenyl-(2-[1,1'-biphenyl]vinyl)-4-amine (NSPI-TPA)

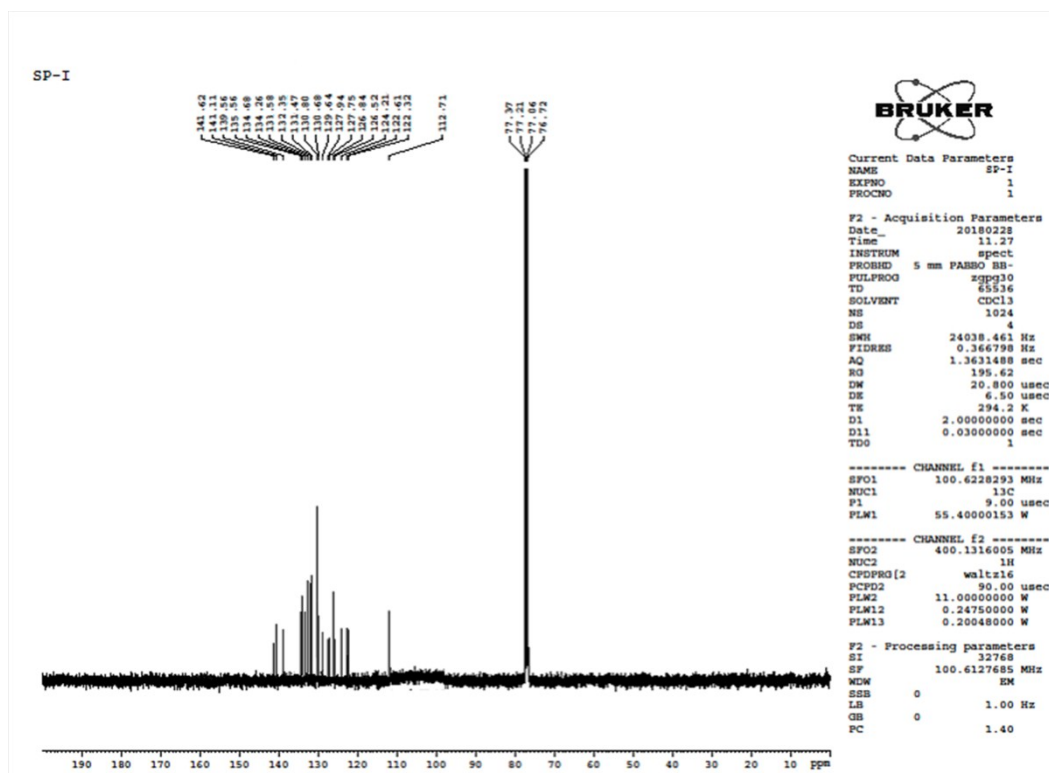

**Figure S3.**  $^1\text{H}$  NMR spectrum of 4'-(1-(2-methylnaphthalen-1-yl)-1H-phenanthro[9,10-d]imidazol-2-yl)-N,N-diphenyl-(2-[1,1'-biphenyl]vinyl)-4-amine (MNSPI-TPA)

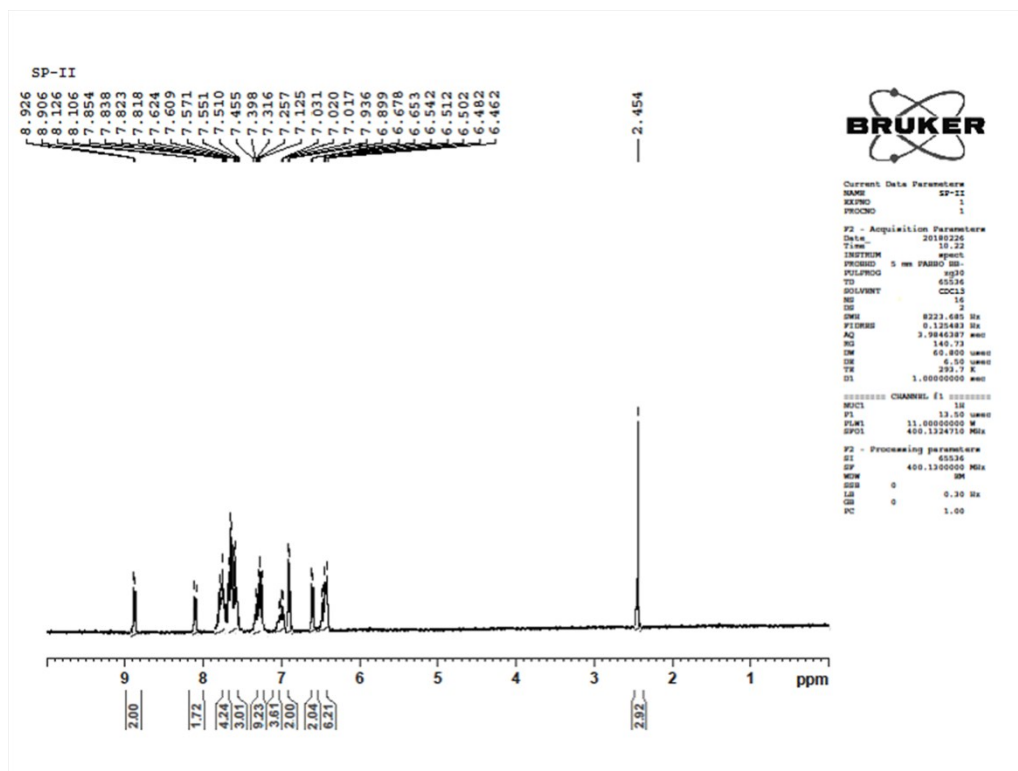

**Figure S4.**  $^{13}\text{C}$  NMR spectrum of 4'-(1-(2-methylnaphthalen-1-yl)-1H-phenanthro[9,10-d]imidazol-2-yl)-N,N-diphenyl-(2-[1,1'-biphenyl]vinyl)-4-amine (MNSPI-TPA)

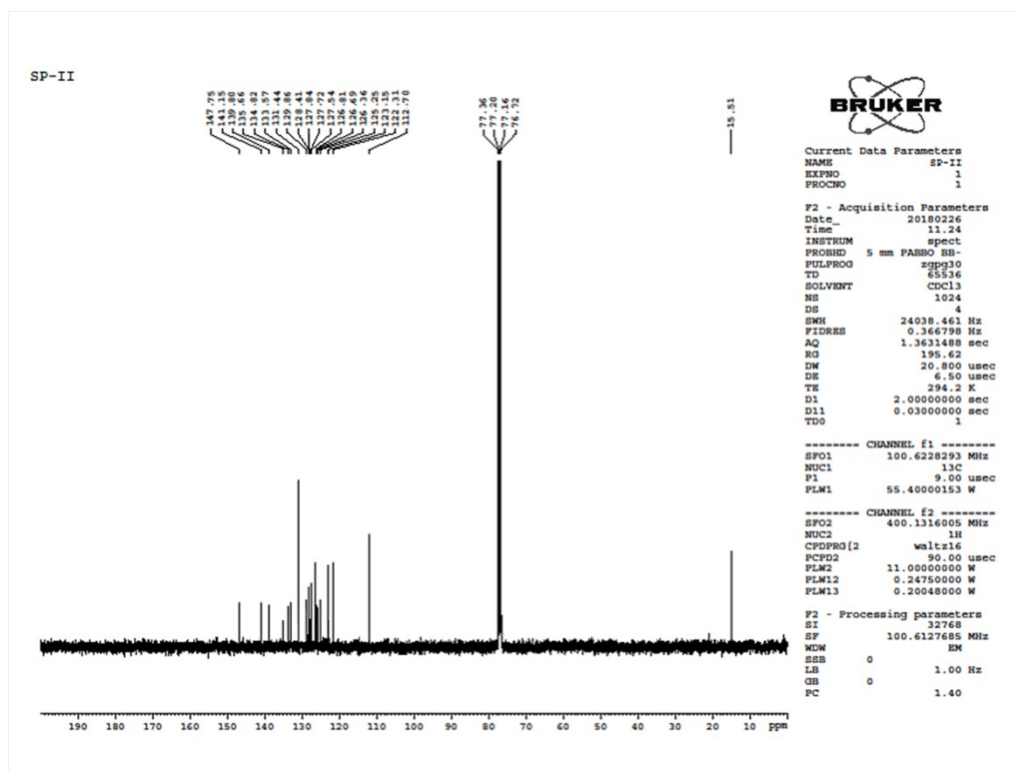

**Figure S5.**  $^1\text{H}$  NMR spectrum of 4-(2-(4'-(diphenylamino)-(2-[1,1'-biphenyl]vinyl-4-yl)-1H-phenanthro[9,10-d]imidazol-1-yl)-1-naphthonitrile (SPNCN-TPA)

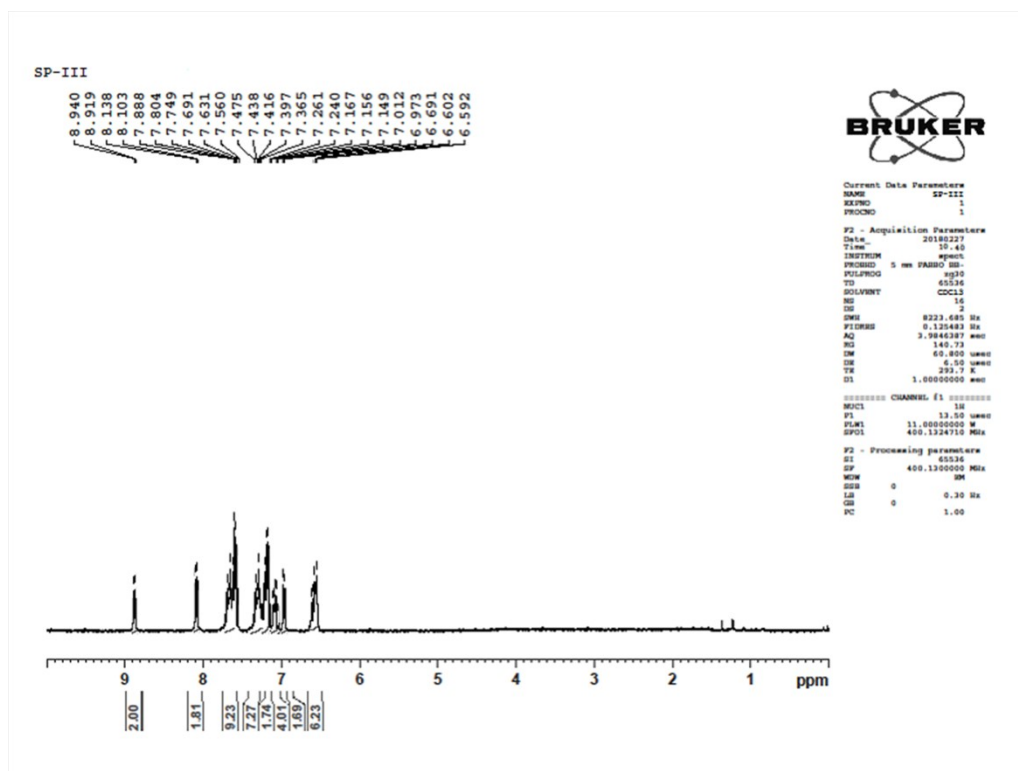

**Figure S6.**  $^{13}\text{C}$  NMR spectrum of 4-(2-(4'-(diphenylamino)-(2-[1,1'-biphenyl]vinyl-4-yl)-1H-phenanthro[9,10-d]imidazol-1-yl)-1-naphthonitrile (SPNCN-TPA)

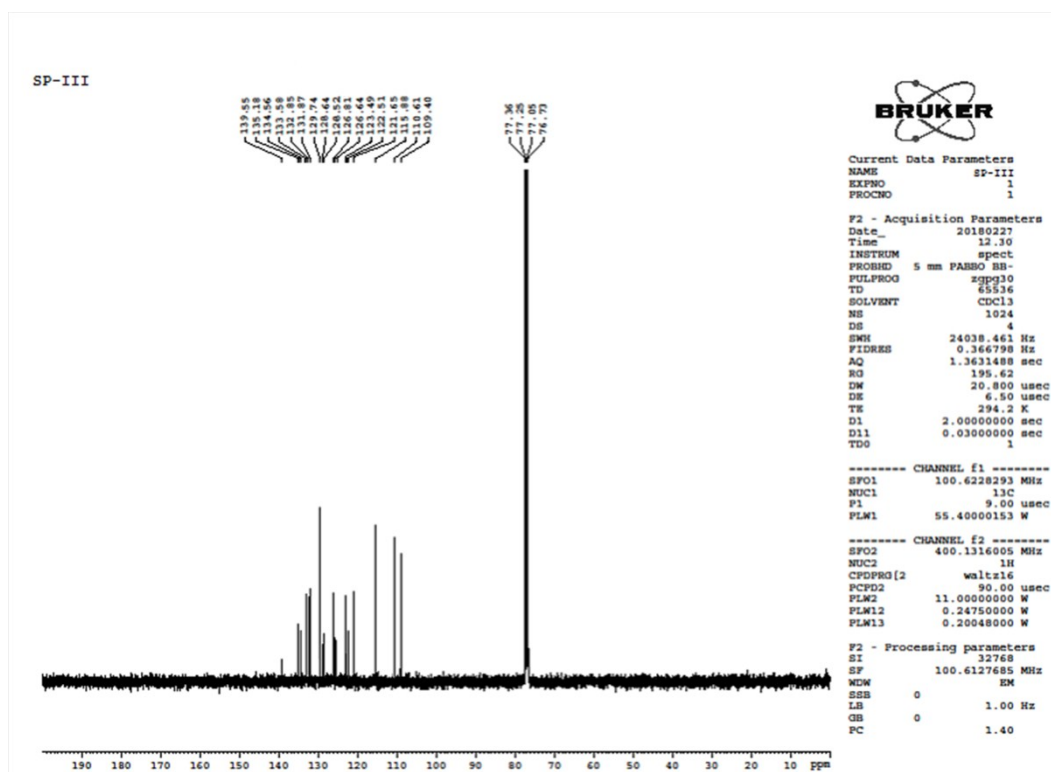

**Figure S7.**  $^1\text{H}$  NMR spectrum of 4-(2-(4-(9H-carbazol-9-yl)styryl)-1H-phenanthro[9,10-d]imidazol-1-yl)naphthalene-1-carbonitrile (SPNCN-Cz)

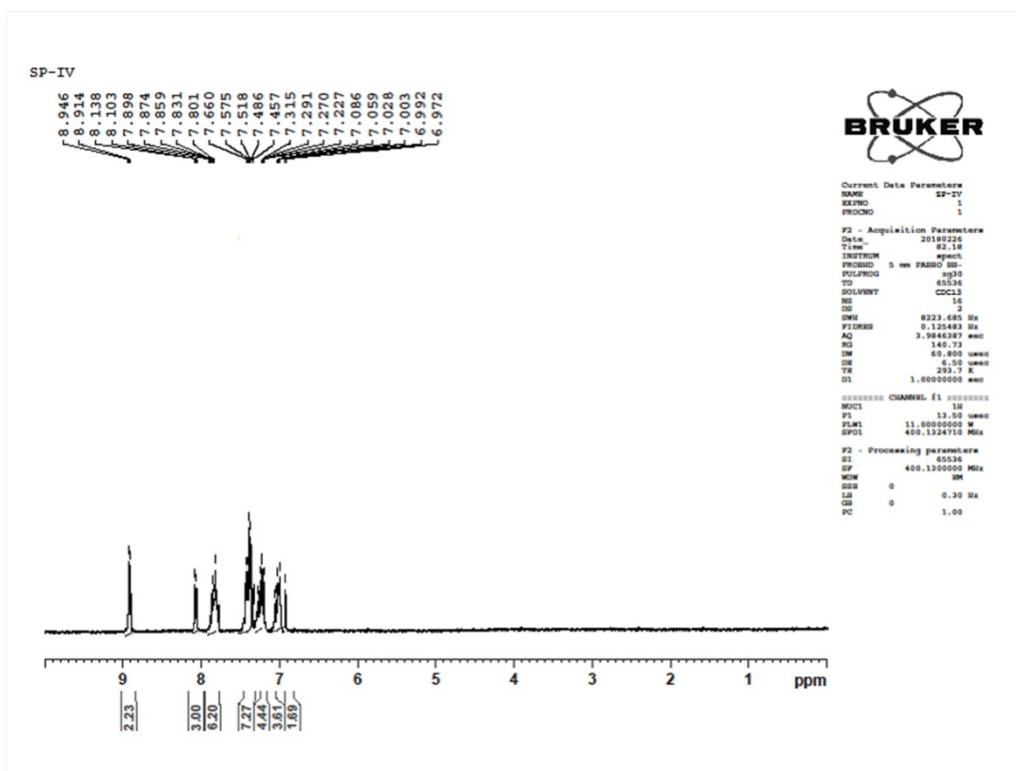

**Figure S8.**  $^{13}\text{C}$  NMR spectrum of 4-(2-(4-(9H-carbazol-9-yl)styryl)-1H-phenanthro[9,10-d]imidazol-1-yl)naphthalene-1-carbonitrile (SPNCN-Cz)

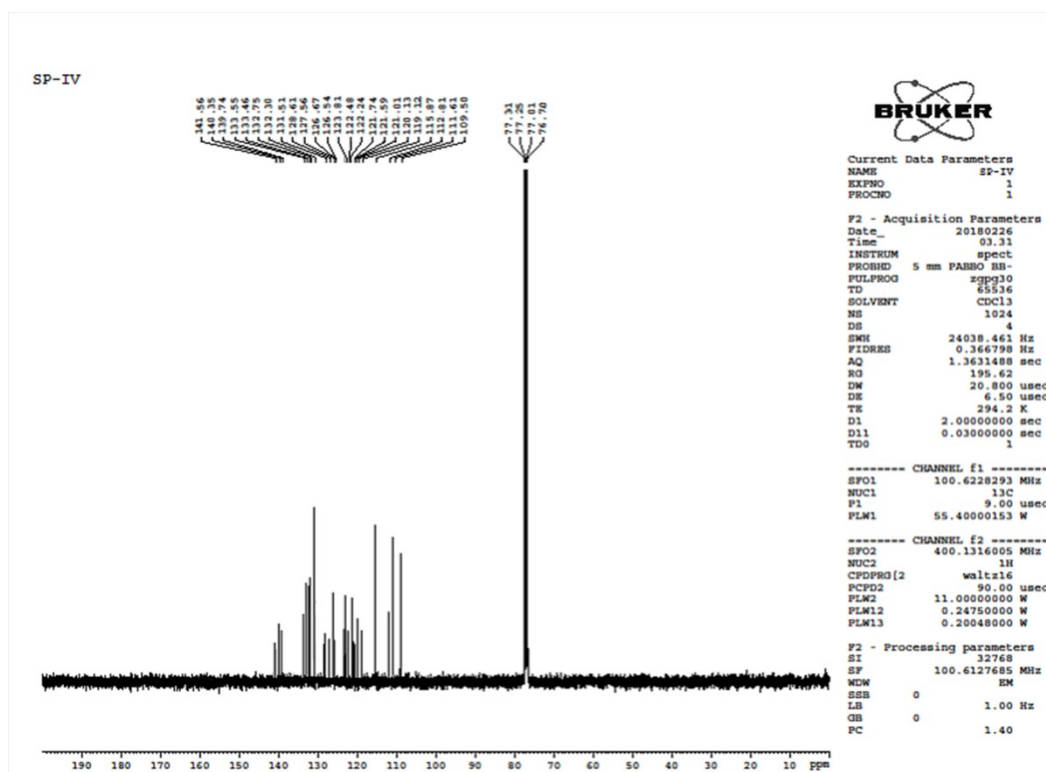



**Figure S9.** MALDI-TOF mass spectra of (a) NSPI-TPA; (b) MNSPI-TPA; (c) SPNCN-TPA and (d) SPNCN-Cz

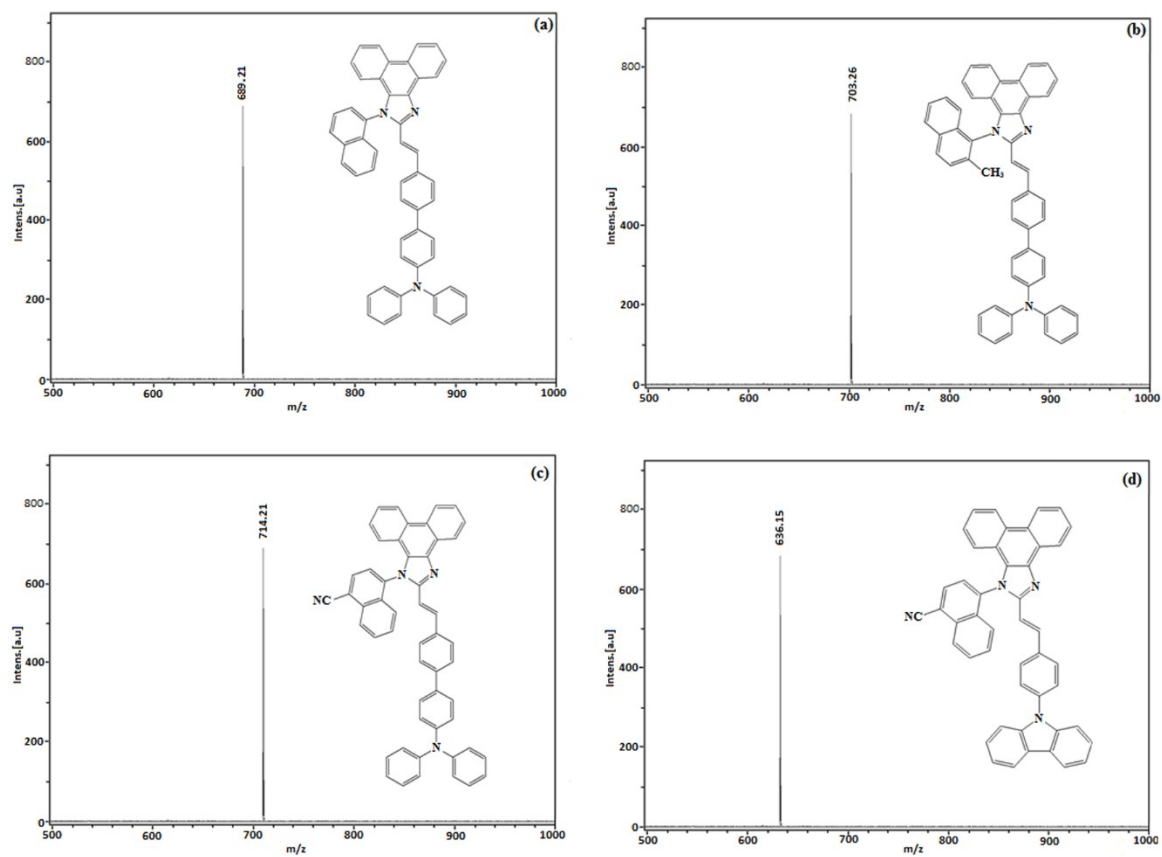

**Figure S10.** Solvatochromic emission spectra of a) SPICN-TPA and b) SPICN-Cz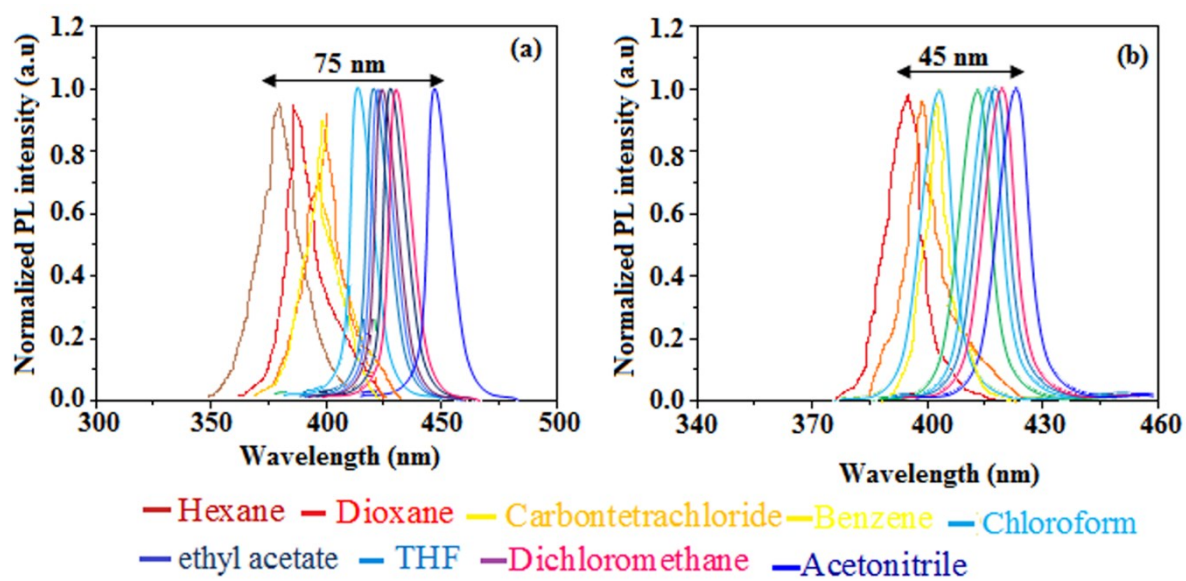

**Figure S11.** Normalized absorption spectra of a) SPICN-TPA and b) SPICN-Cz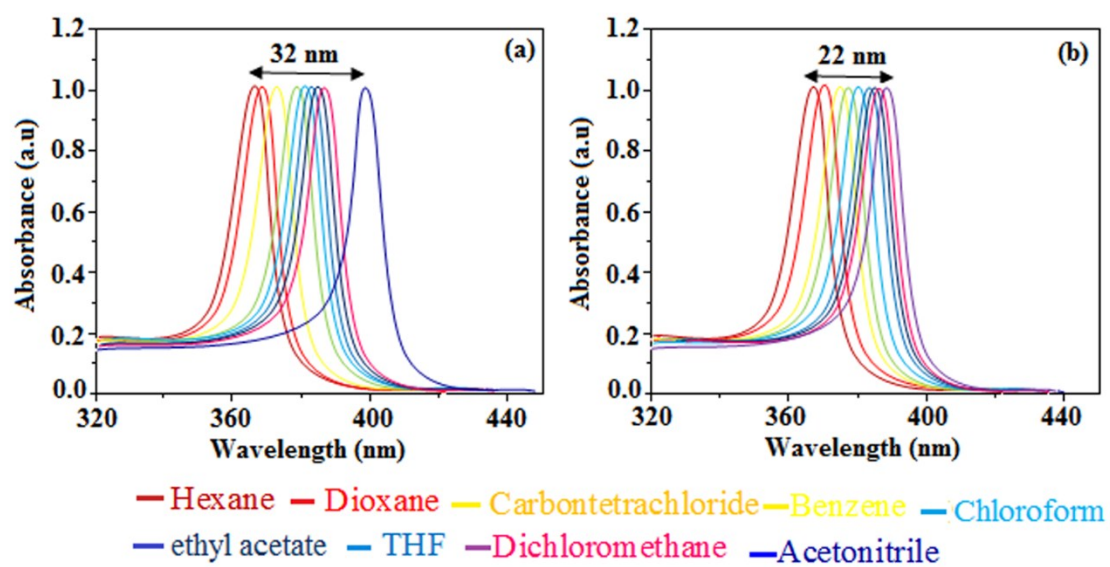

**Figure S12.** Computed hole and particle distribution of SPNCN-TPA for first ten single states ( $S_1$ – $S_{10}$ ); green and blue areas represent increasing and decreasing electron density respectively.

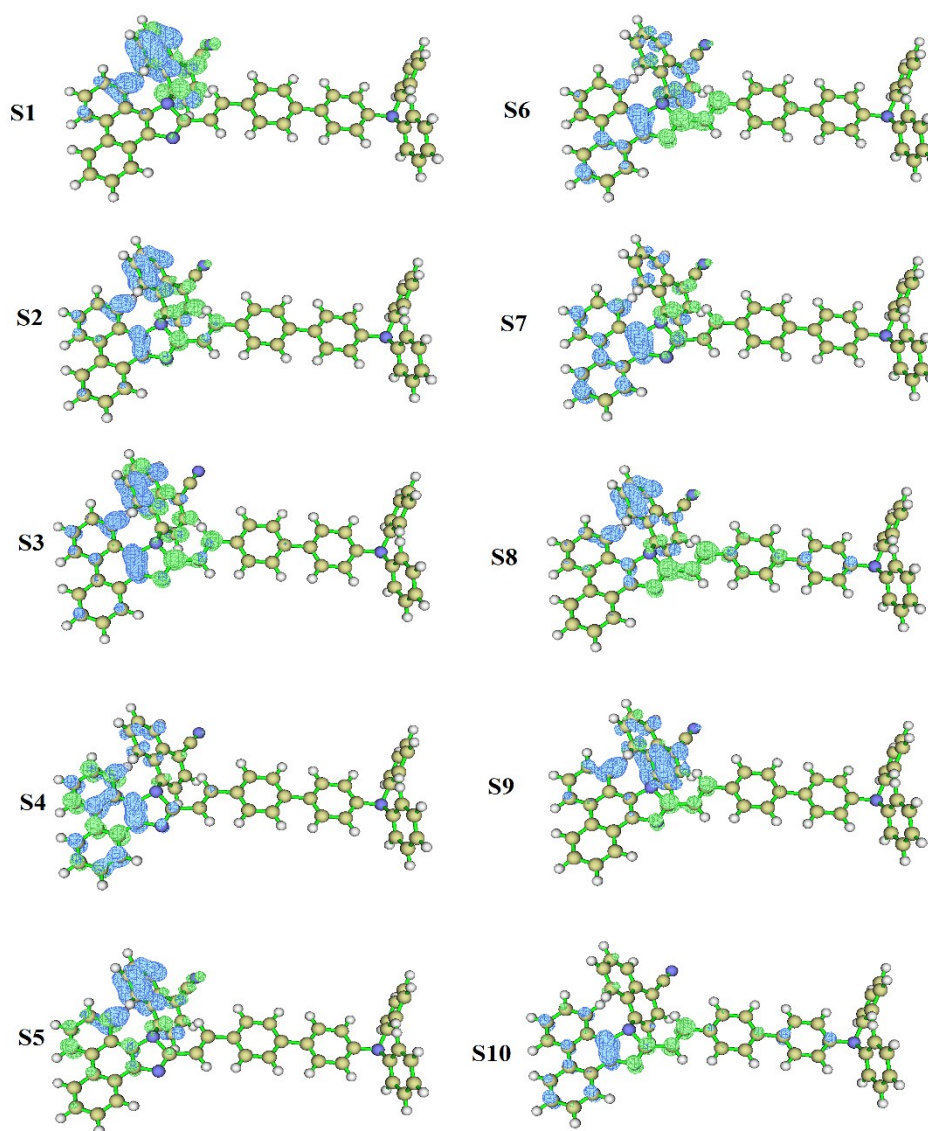

**Figure S13.** Computed hole and particle distribution of SPNCN-Cz for first ten single states ( $S_1$ – $S_{10}$ ); green and blue areas represent increasing and decreasing electron density respectively.

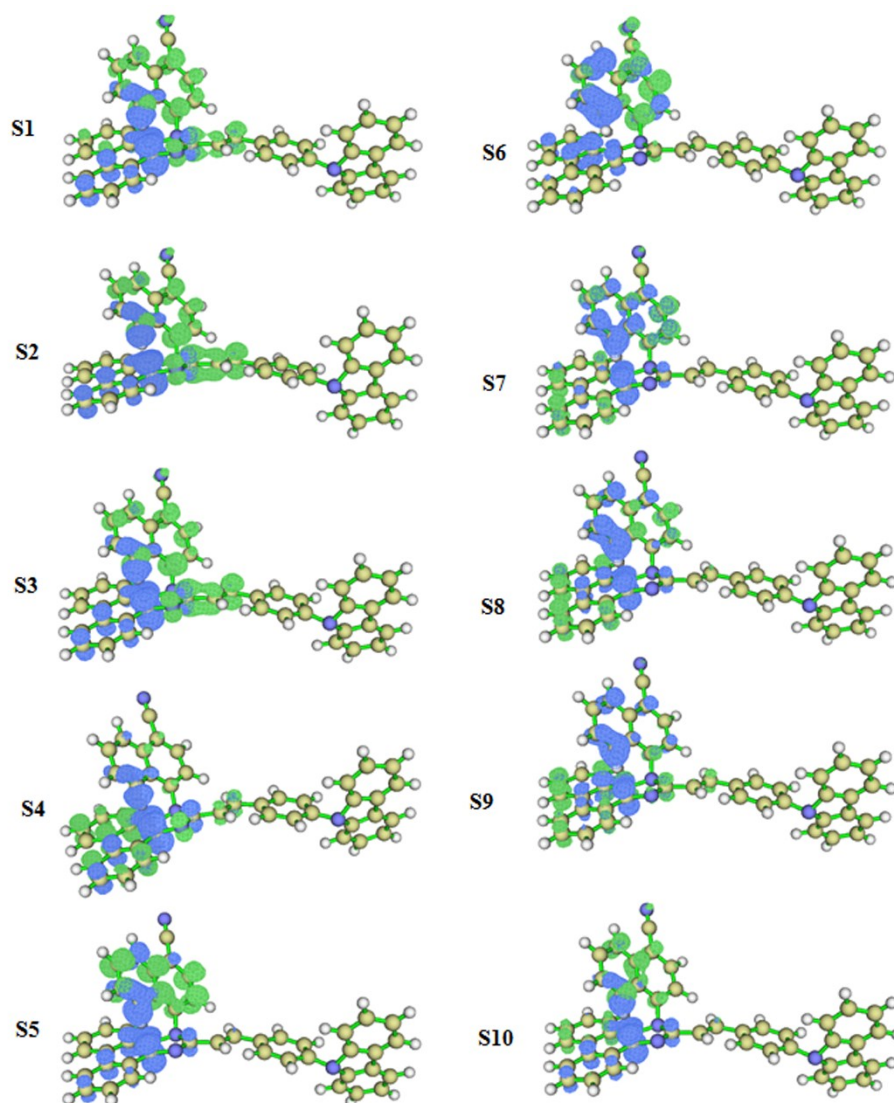

**Figure S14.** Computed natural transition orbital (NTO) pairs and transition character analysis for the first ten singlet ( $S_1$ - $S_{10}$ ) and triplet states ( $T_1$ - $T_{10}$ ) of SPNCN-TPA [ $f$ -oscillator strength and percentage weights of hole-particle are given for  $S_0 \rightarrow S_n$  and  $S_0 \rightarrow T_n$  transitions ( $n=1-10$ )]

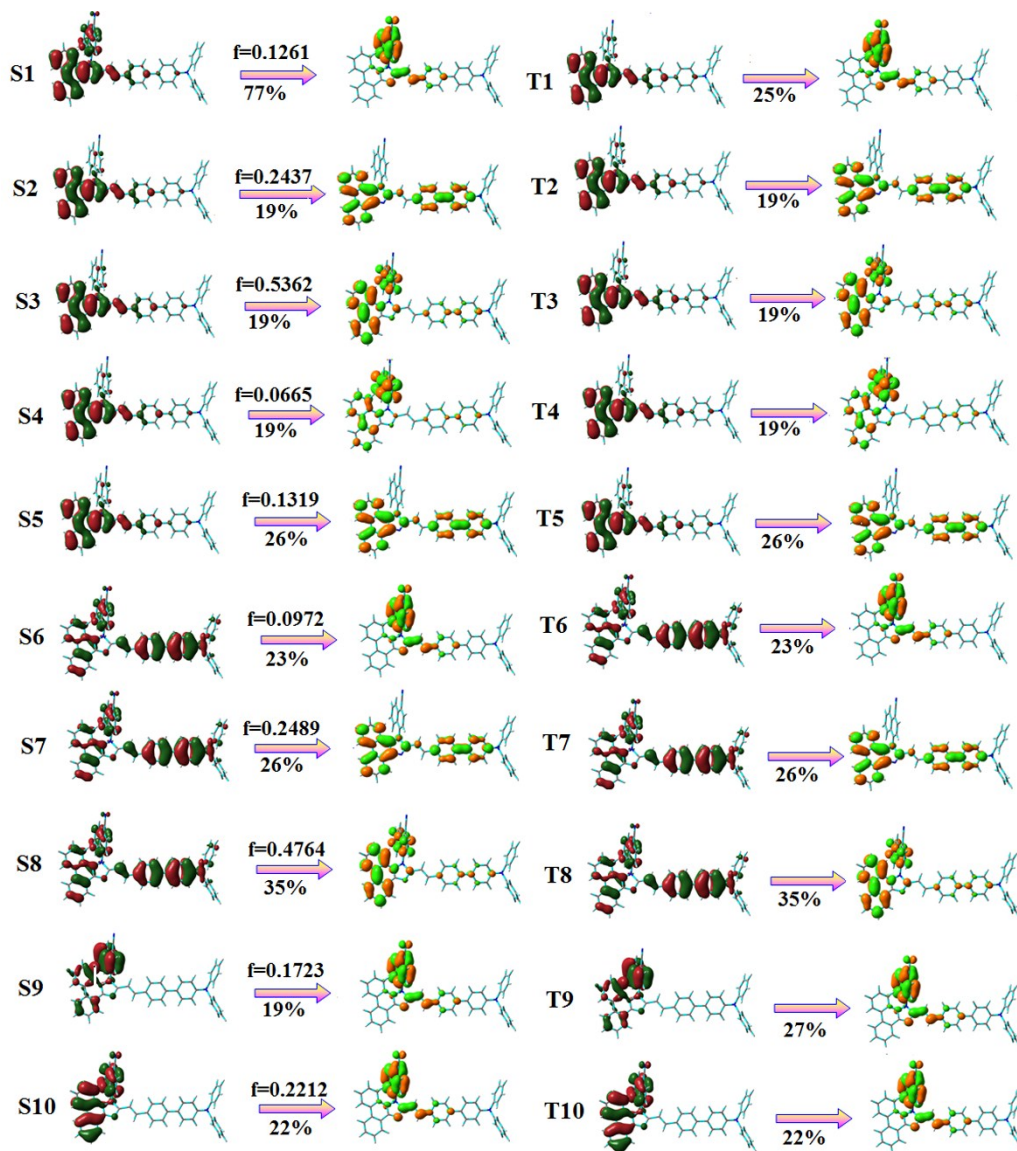

**Figure S15.** Computed natural transition orbital (NTO) pairs and transition character analysis for the first ten singlet ( $S_1$ - $S_{10}$ ) and triplet states ( $T_1$ - $T_{10}$ ) of SPNCN-Cz [ $f$ -oscillator strength and percentage weights of hole-particle are given for  $S_0 \rightarrow S_n$  and  $S_0 \rightarrow T_n$  transitions ( $n=1-10$ )]

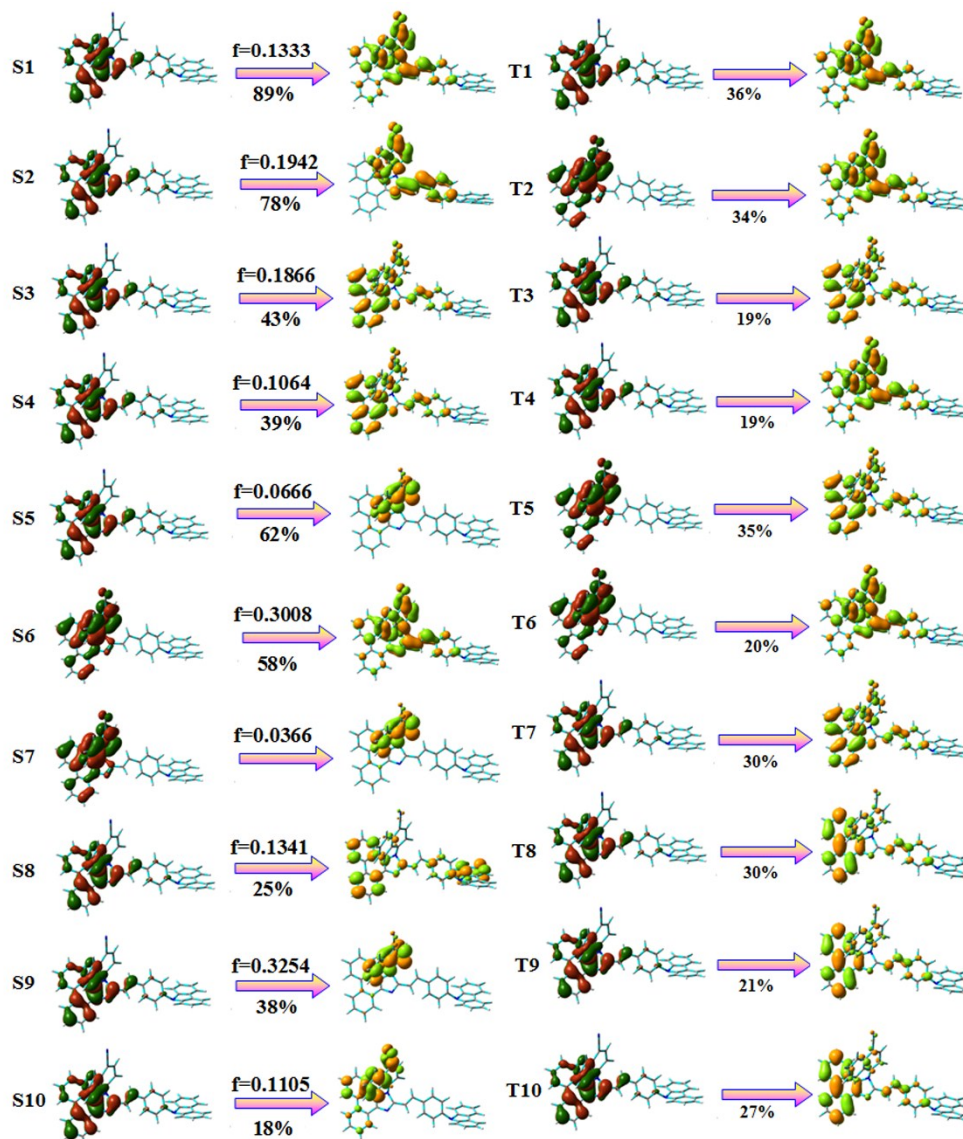

**Figure S16:** Computed contour plots of transition density matrices (TDM) of SPNCN-TPA for  $S_1$ – $S_5$  states.

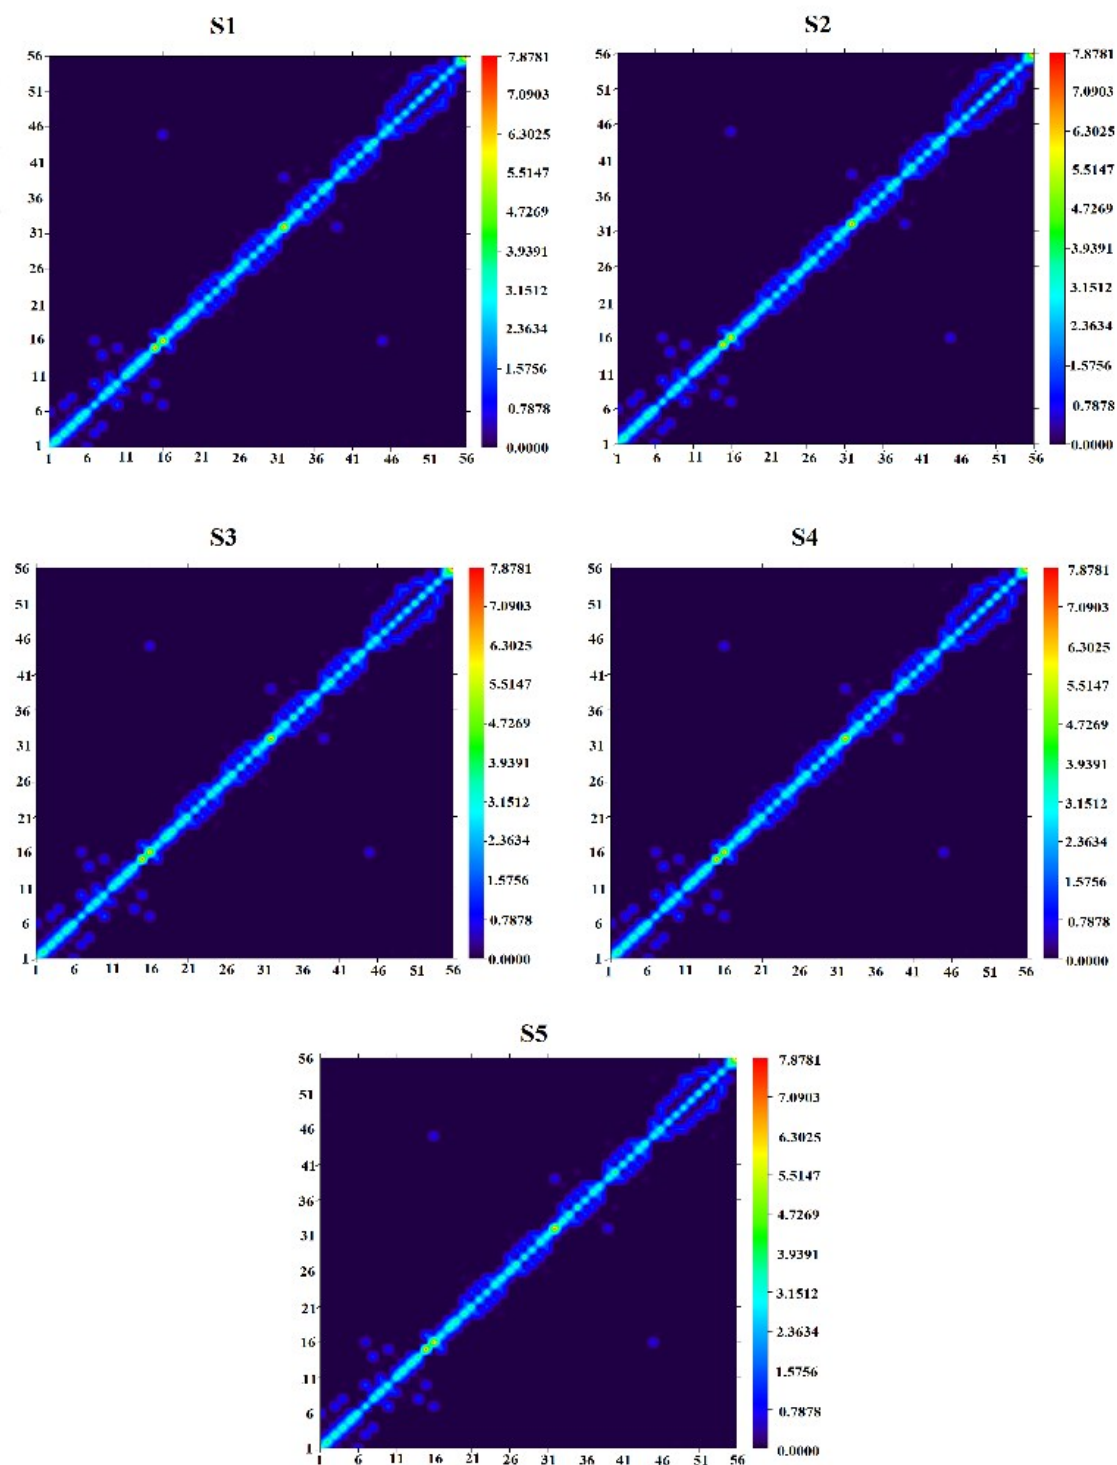



**Figure S17:** Computed contour plots of transition density matrices (TDM) of SPNCN-Cz for  $S_1$ – $S_5$  states.

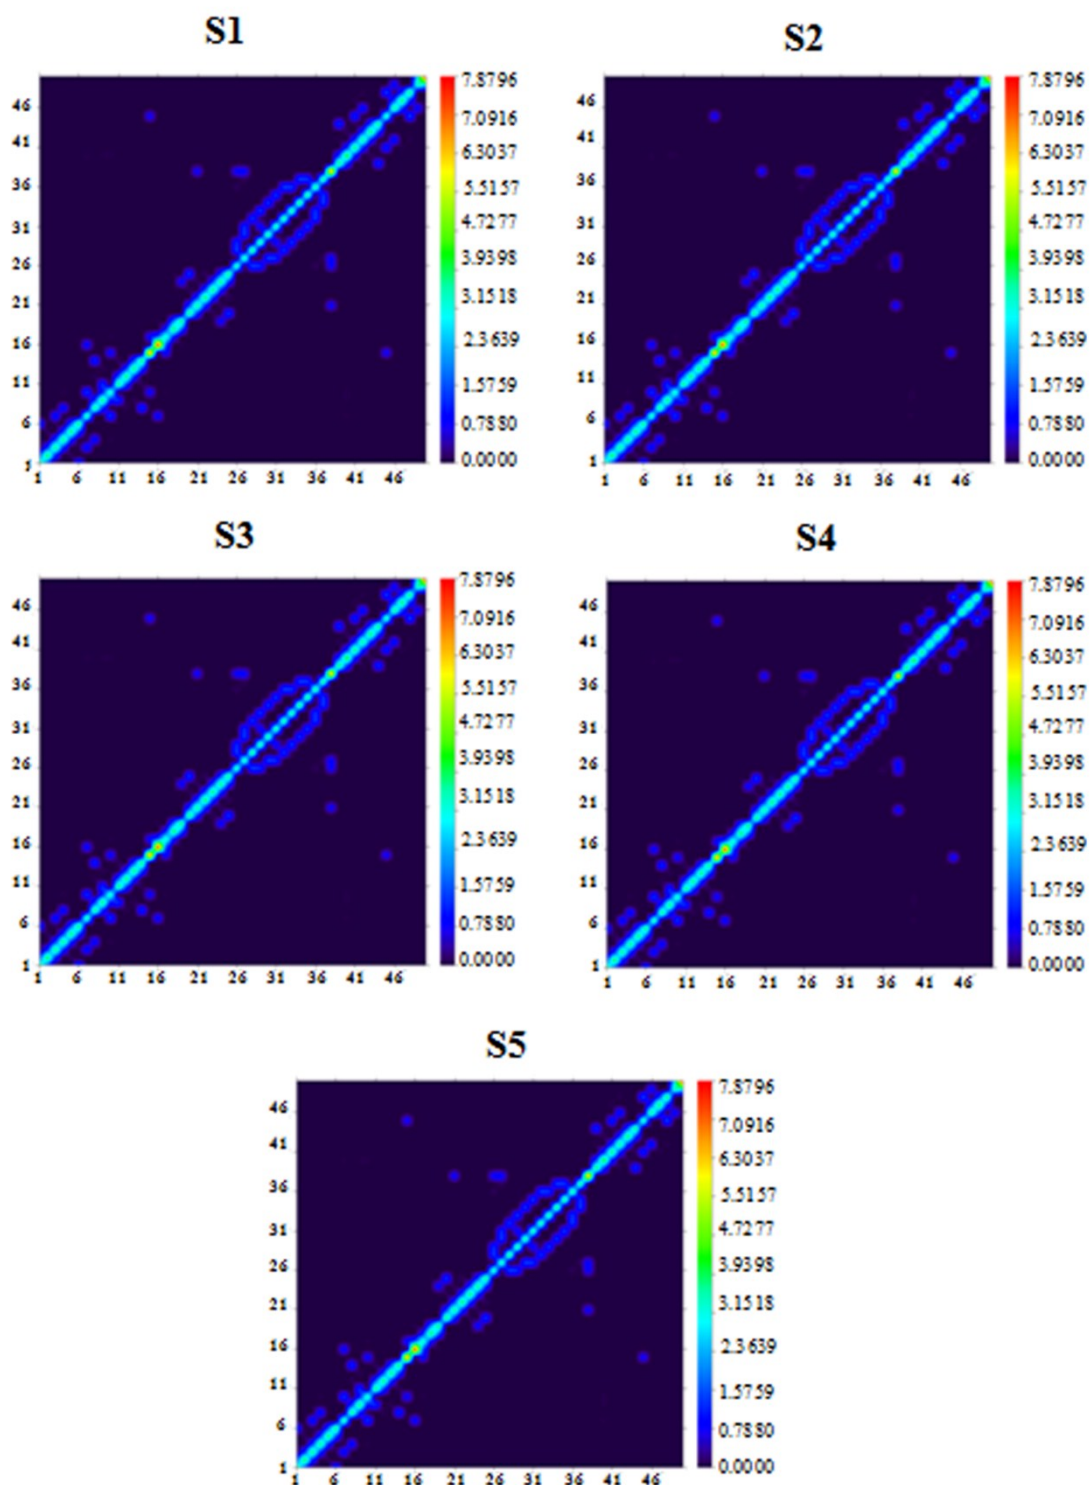

## SI-X: Tables

Table S1: Detailed photophysical properties of SPNCN-TPA in different solvents.

| Solvents            | $\epsilon$ | n    | f( $\epsilon, n$ ) | ET(30) | $\lambda_{ab}$<br>(nm) | $\nu_{ab}$<br>( $\text{cm}^{-1}$ ) | $\lambda_{flu}$<br>(nm) | $\nu_{flu}$<br>( $\text{cm}^{-1}$ ) | $\nu_{ss}$<br>( $\text{cm}^{-1}$ ) | $\Delta G$<br>(kcal/mol) | $\Delta(\Delta G_{hex} - \Delta G_{sol})$<br>(kcal/mol) | $\lambda$<br>(kcal/mol) |
|---------------------|------------|------|--------------------|--------|------------------------|------------------------------------|-------------------------|-------------------------------------|------------------------------------|--------------------------|---------------------------------------------------------|-------------------------|
| Hexane              | 1.88       | 1.37 | 0.000411           | 32.4   | 366                    | 27322.4                            | 373                     | 26455.03                            | 1100.4                             | 76.86                    | 5.66                                                    | 1.24                    |
| Dioxane             | 2.22       | 1.42 | 0.021437           | 36.0   | 369                    | 27100.2                            | 385                     | 25974.03                            | 1126.2                             | 75.86                    | 6.66                                                    | 1.61                    |
| Carbontetrachloride | 2.23       | 1.46 | 0.011075           | 39.1   | 372                    | 26881.7                            | 390                     | 25641.03                            | 1200.0                             | 75.07                    | 7.45                                                    | 1.77                    |
| Benzene             | 2.28       | 1.42 | 0.026639           | 34.3   | 378                    | 26455.0                            | 391                     | 25575.45                            | 1300.9                             | 74.36                    | 8.16                                                    | 1.26                    |
| Chloroform          | 4.81       | 1.44 | 0.148262           | 39.1   | 387                    | 25839.7                            | 410                     | 24390.24                            | 1941.6                             | 71.79                    | 10.73                                                   | 2.07                    |
| Ethyl acetate       | 6.09       | 1.41 | 0.186569           | 38.1   | 383                    | 26109.6                            | 415                     | 24096.39                            | 1449.5                             | 71.76                    | 10.76                                                   | 2.88                    |
| THF                 | 7.52       | 1.40 | 0.209634           | 37.4   | 383                    | 26109.6                            | 431                     | 23201.86                            | 1500.1                             | 70.48                    | 12.04                                                   | 4.16                    |
| Dichloromethane     | 9.08       | 1.42 | 0.218349           | 40.7   | 398                    | 25125.6                            | 448                     | 22321.43                            | 1800.2                             | 67.81                    | 14.71                                                   | 4.01                    |
| Acetonitrile        | 37.5       | 1.34 | 0.305378           | 45.6   | 367                    | 27247.9                            | 422                     | 23696.68                            | 1300.8                             | 72.81                    | 9.71                                                    | 5.08                    |

**Table S2:** Detailed photophysical properties of SPNCN-Cz in different solvents.

| Solvents            | $\epsilon$ | n    | f( $\epsilon, n$ ) | ET(30) | $\lambda_{ab}$<br>(nm) | $\nu_{ab}$<br>( $\text{cm}^{-1}$ ) | $\lambda_{flu}$<br>(nm) | $\nu_{flu}$<br>( $\text{cm}^{-1}$ ) | $\nu_{ss}$<br>( $\text{cm}^{-1}$ ) | $\Delta G$<br>(kcal/mol) | $\Delta(\Delta G_{hex} - \Delta G_{sol})$<br>(kcal/mol) | $\lambda$<br>(kcal/mol) |
|---------------------|------------|------|--------------------|--------|------------------------|------------------------------------|-------------------------|-------------------------------------|------------------------------------|--------------------------|---------------------------------------------------------|-------------------------|
| Hexane              | 1.88       | 1.37 | 0.000411           | 32.4   | 368                    | 27173.91                           | 390                     | 25641.03                            | 1200.7                             | 75.49                    | 7.03                                                    | 2.19                    |
| Dioxane             | 2.22       | 1.42 | 0.021437           | 36.0   | 367                    | 27247.96                           | 394                     | 25380.71                            | 1310.9                             | 75.22                    | 7.30                                                    | 2.67                    |
| Carbontetrachloride | 2.23       | 1.46 | 0.011075           | 39.1   | 375                    | 26666.67                           | 400                     | 25000.00                            | 1200.8                             | 73.84                    | 8.68                                                    | 2.38                    |
| Benzene             | 2.28       | 1.42 | 0.026639           | 34.3   | 379                    | 26385.22                           | 402                     | 24875.62                            | 1509.6                             | 73.26                    | 9.26                                                    | 2.16                    |
| Chloroform          | 4.81       | 1.44 | 0.148262           | 39.1   | 386                    | 25906.74                           | 420                     | 23809.52                            | 1610.2                             | 71.06                    | 11.46                                                   | 3.00                    |
| Ethyl acetate       | 6.09       | 1.41 | 0.186569           | 38.1   | 380                    | 26315.79                           | 425                     | 23529.41                            | 1600.1                             | 71.24                    | 11.28                                                   | 3.98                    |
| THF                 | 7.52       | 1.40 | 0.209634           | 37.4   | 389                    | 25706.94                           | 428                     | 23364.49                            | 2000.5                             | 70.14                    | 12.38                                                   | 3.35                    |
| Dichloromethane     | 9.08       | 1.42 | 0.218349           | 40.7   | 390                    | 25641.03                           | 436                     | 22935.78                            | 2342.4                             | 69.43                    | 13.09                                                   | 3.87                    |
| Acetonitrile        | 37.5       | 1.34 | 0.305378           | 45.6   | 375                    | 26666.67                           | 427                     | 23419.20                            | 1210.7                             | 71.59                    | 10.93                                                   | 4.64                    |

**Table S3:** Computed excitation energy (eV), excitation coefficient and  $\Delta r$  intex ( $\text{\AA}$ ) for first ten singlet & triplet states of SPNCN-TPA.

| State | Singlet           |                        |                  | Triplet           |                        |                  |
|-------|-------------------|------------------------|------------------|-------------------|------------------------|------------------|
|       | Excitation energy | Excitation coefficient | $\Delta r$ intex | Excitation energy | Excitation coefficient | $\Delta r$ intex |
| 1     | 1.8564            | 0.4512                 | 2.6902           | 1.0337            | 0.3419                 | 2.8747           |
| 2     | 2.5982            | 0.3841                 | 2.9476           | 1.4621            | 0.2704                 | 3.3012           |
| 3     | 3.2337            | 0.4265                 | 3.0228           | 1.8564            | 0.2411                 | 3.1288           |
| 4     | 2.2089            | 0.3886                 | 2.5989           | 1.8984            | 0.2698                 | 4.4636           |
| 5     | 3.5790            | 0.3748                 | 2.8390           | 1.9372            | 0.2582                 | 3.5922           |
| 6     | 3.6604            | 0.4011                 | 4.3462           | 1.9800            | 0.3376                 | 2.5547           |
| 7     | 3.8563            | 0.3880                 | 2.7934           | 2.0141            | 0.3426                 | 2.4375           |
| 8     | 3.8697            | 0.3929                 | 3.6828           | 2.2448            | 0.2097                 | 3.2220           |
| 9     | 2.3083            | 0.3718                 | 5.1501           | 2.4031            | 0.3382                 | 2.9111           |
| 10    | 4.0491            | 0.3330                 | 4.2253           | 2.4208            | 0.2508                 | 2.7478           |

**Table S4:** Computed excitation energy (eV), excitation coefficient and  $\Delta r$  intex ( $\text{\AA}$ ) for first ten singlet & triplet states of SPNCN-Cz.

| State | Singlet           |                        |                  | Triplet           |                        |                  |
|-------|-------------------|------------------------|------------------|-------------------|------------------------|------------------|
|       | Excitation energy | Excitation coefficient | $\Delta r$ intex | Excitation energy | Excitation coefficient | $\Delta r$ intex |
| 1     | 1.5056            | 0.4581                 | 2.1166           | 0.8911            | 0.4083                 | 1.8451           |
| 2     | 1.4843            | 0.4334                 | 1.8085           | 1.2676            | 0.3279                 | 3.3501           |
| 3     | 2.7449            | 0.4279                 | 1.9804           | 1.5056            | 0.2747                 | 3.5916           |
| 4     | 1.6373            | 0.4368                 | 4.3566           | 1.8630            | 0.2403                 | 2.9946           |
| 5     | 3.3437            | 0.4330                 | 3.1627           | 2.0033            | 0.3884                 | 2.6931           |
| 6     | 3.4154            | 0.4198                 | 3.1581           | 2.0033            | 0.2312                 | 3.2011           |
| 7     | 3.6786            | 0.3973                 | 2.0510           | 2.1570            | 0.2903                 | 2.7894           |
| 8     | 3.7524            | 0.3489                 | 2.6077           | 2.2857            | 0.3717                 | 3.2941           |
| 9     | 3.8573            | 0.3549                 | 3.0051           | 2.3497            | 0.2736                 | 2.5449           |
| 10    | 3.9054            | 0.3630                 | 3.9147           | 2.4017            | 0.1471                 | 3.5162           |

**Table S5:** Computed hole (H) and electron (E) overlap (S), distance between centroids of H and E (D, Å) and dipole moment ( $\mu$ ) for the first ten  $S_1$ – $S_{10}$  states of SPNCN-TPA.

| State | Integral of hole | Integral of electron | Integral of transition density | Integral overlap of H–E (S) | Centroid of H (Å) |         |         | Centroid of E (Å) |         |         | D (Å) | $\mu$ (a.u) |
|-------|------------------|----------------------|--------------------------------|-----------------------------|-------------------|---------|---------|-------------------|---------|---------|-------|-------------|
|       |                  |                      |                                |                             | x                 | y       | z       | x                 | y       | z       |       |             |
| S1    | 0.9006           | 0.7263               | -0.0021                        | 0.3835                      | -5.6293           | 2.1749  | 0.6300  | -4.5203           | 2.2475  | 0.0541  | 1.25  | 1.9243      |
| S2    | 0.7765           | 0.5902               | 0.0204                         | 0.3309                      | -5.1512           | 0.8468  | 0.3953  | -4.2221           | 0.9279  | -0.0972 | 1.05  | 1.3621      |
| S3    | 0.8647           | 0.6622               | 0.0008                         | 0.3575                      | -5.2417           | 0.5025  | 0.3598  | -3.9985           | 0.6323  | 0.1451  | 1.27  | 1.8299      |
| S4    | 0.8009           | 0.6010               | 0.0027                         | 0.3952                      | -6.0712           | -0.6332 | 0.1841  | -6.4606           | -0.5931 | -0.0207 | 0.44  | 0.5852      |
| S5    | 0.7565           | 0.5757               | 0.0116                         | 0.3308                      | -5.4025           | 1.6253  | 0.5164  | -5.5919           | 0.8637  | 0.0076  | 0.94  | 1.1772      |
| S6    | 0.8378           | 0.6492               | 0.0102                         | 0.3867                      | -4.5351           | 0.0259  | 0.0125  | -3.6480           | 0.5372  | 0.1201  | 1.03  | 1.4466      |
| S7    | 0.8028           | 0.6025               | 0.0137                         | 0.4142                      | -5.7240           | -0.6599 | 0.1073  | -4.8177           | -0.0280 | -0.0745 | 1.12  | 1.4868      |
| S8    | 0.8048           | 0.6256               | -0.0001                        | 0.3311                      | -3.1777           | 0.9145  | 0.2532  | -2.3984           | 0.0722  | 0.0207  | 1.17  | 1.5825      |
| S9    | 0.7751           | 0.5943               | -0.0081                        | 0.3957                      | -4.8453           | 1.0955  | 0.1047  | -4.1389           | 0.6574  | 0.1115  | 0.83  | 1.0757      |
| S10   | 0.7005           | 0.5222               | -0.0113                        | 0.3377                      | -3.3424           | -0.7305 | -0.0340 | -3.2549           | -0.4343 | 0.1016  | 0.3   | 0.3897      |

**Table S6:** Computed RMSD of electron and hole, H index and t index for first ten singlet states (S<sub>1</sub>–S<sub>10</sub>) of SPNCN-TPA.

| State | RMSD of electron |       |       |       | RMSD of hole |       |       |       | H index |       |       |       | t index |        |        |       |
|-------|------------------|-------|-------|-------|--------------|-------|-------|-------|---------|-------|-------|-------|---------|--------|--------|-------|
|       | x                | y     | z     | total | x            | y     | z     | total | x       | y     | z     | norm  | x       | y      | z      | norm  |
| S1    | 1.761            | 1.921 | 1.263 | 2.896 | 1.787        | 1.929 | 1.137 | 2.865 | 1.774   | 1.925 | 1.200 | 2.880 | -0.665  | -1.853 | -0.624 | 2.065 |
| S2    | 2.297            | 2.385 | 1.167 | 3.511 | 3.292        | 2.478 | 1.029 | 4.247 | 2.795   | 2.432 | 1.098 | 3.864 | -1.866  | -2.351 | -0.605 | 3.061 |
| S3    | 2.505            | 2.319 | 1.067 | 3.576 | 2.977        | 2.547 | 1.023 | 4.050 | 2.741   | 2.433 | 1.045 | 3.811 | -1.498  | -2.303 | -0.830 | 2.870 |
| S4    | 2.882            | 2.639 | 0.885 | 4.007 | 2.835        | 2.607 | 0.913 | 3.958 | 2.858   | 2.623 | 0.899 | 3.982 | -2.469  | -2.583 | -0.694 | 3.640 |
| S5    | 2.745            | 2.551 | 1.070 | 3.897 | 2.538        | 2.275 | 1.093 | 3.579 | 2.641   | 2.413 | 1.082 | 3.738 | -2.452  | -1.652 | -0.573 | 3.011 |
| S6    | 2.719            | 2.303 | 1.022 | 3.707 | 3.848        | 2.640 | 0.985 | 4.770 | 3.284   | 2.472 | 1.003 | 4.230 | -2.396  | -1.960 | -0.896 | 3.223 |
| S7    | 3.157            | 2.632 | 0.971 | 4.223 | 3.233        | 2.562 | 0.914 | 4.225 | 3.195   | 2.597 | 0.943 | 4.224 | -2.289  | -1.965 | -0.761 | 3.111 |
| S8    | 3.823            | 2.200 | 0.935 | 4.509 | 5.018        | 2.381 | 1.097 | 5.662 | 4.421   | 2.291 | 1.016 | 5.081 | -3.641  | -1.448 | -0.783 | 3.996 |
| S9    | 2.974            | 2.419 | 1.068 | 3.980 | 2.907        | 2.230 | 1.015 | 3.802 | 2.940   | 2.325 | 1.041 | 3.890 | -2.234  | -1.886 | -1.035 | 3.102 |
| S10   | 4.325            | 2.316 | 0.882 | 4.984 | 5.567        | 2.262 | 0.869 | 6.072 | 4.946   | 2.289 | 0.875 | 5.520 | -4.859  | -1.992 | -0.740 | 5.303 |

**Table S7:** Computed hole (H) and electron (E) overlap (S), distance between centroids of H and E (D, Å) and dipole moment ( $\mu$ ) for the first ten  $S_1$ – $S_{10}$  states of SPNCN-Cz.

| State | Integral of hole | Integral of electron | Integral of transition density | Integral overlap of H–E (S) | Centroid of H (Å) |       |      | Centroid of E (Å) |       |       | D (Å) | $\mu$ (a.u) |
|-------|------------------|----------------------|--------------------------------|-----------------------------|-------------------|-------|------|-------------------|-------|-------|-------|-------------|
|       |                  |                      |                                |                             | x                 | y     | z    | x                 | y     | z     |       |             |
| S1    | 0.8359           | 0.7214               | -0.0150                        | 0.2331                      | -3.77             | -1.06 | 0.15 | -2.84             | 0.93  | 0.01  | 2.20  | 3.24        |
| S2    | 0.8505           | 0.7185               | 0.0123                         | 0.2453                      | -3.77             | -1.06 | 0.15 | -2.41             | 0.90  | 0.07  | 2.39  | 3.54        |
| S3    | 0.8505           | 0.7185               | 0.0123                         | 0.2453                      | -3.77             | -1.06 | 0.15 | -2.41             | 0.90  | 0.07  | 2.39  | 3.54        |
| S4    | 0.8056           | 0.6473               | 0.0133                         | 0.2538                      | -3.77             | -1.06 | 0.15 | -4.20             | -1.03 | -0.22 | 0.56  | 0.77        |
| S5    | 0.8581           | 0.6533               | 0.0008                         | 0.2342                      | -4.11             | -0.21 | 0.26 | -3.83             | 2.10  | 0.46  | 2.34  | 3.34        |
| S6    | 0.8748           | 0.6685               | -0.0038                        | 0.4122                      | -4.43             | 0.77  | 0.28 | -3.59             | 2.18  | 0.17  | 1.64  | 2.39        |
| S7    | 0.8264           | 0.6028               | -0.0131                        | 0.4341                      | -3.83             | 0.43  | 0.21 | -4.17             | 0.71  | 0.01  | 0.48  | 0.65        |
| S8    | 0.8022           | 0.5971               | 0.0107                         | 0.3879                      | -3.93             | -0.03 | 0.21 | -4.12             | -0.19 | -0.22 | 0.50  | 0.67        |
| S9    | 0.7887           | 0.5760               | -0.0178                        | 0.3776                      | -3.73             | -0.02 | 0.12 | -4.08             | -0.41 | -0.45 | 0.77  | 1.00        |
| S10   | 0.6858           | 0.4973               | 0.0062                         | 0.2626                      | -3.72             | -0.78 | 0.12 | -4.34             | 0.89  | 0.17  | 1.79  | 2.00        |



**Table S8:** Computed RMSD of electron and hole, H index and t index for first ten singlet states ( $S_1$ – $S_{10}$ ) of SPNCN-Cz.

| State | RMSD of electron |       |       |       | RMSD of hole |       |       |       | H index |       |       |       | t index |        |        |       |
|-------|------------------|-------|-------|-------|--------------|-------|-------|-------|---------|-------|-------|-------|---------|--------|--------|-------|
|       | x                | y     | z     | total | x            | y     | z     | total | x       | y     | z     | norm  | x       | y      | z      | Norm  |
| S1    | 2.629            | 2.290 | 1.156 | 3.673 | 1.779        | 1.736 | 1.038 | 2.693 | 2.204   | 2.013 | 1.097 | 3.180 | -1.275  | -0.021 | -0.959 | 1.596 |
| S2    | 2.352            | 2.108 | 1.038 | 3.325 | 1.779        | 1.736 | 1.038 | 2.693 | 2.065   | 1.922 | 1.038 | 3.006 | -0.706  | 0.047  | -0.959 | 1.192 |
| S3    | 2.352            | 2.108 | 1.038 | 3.325 | 1.779        | 1.736 | 1.038 | 2.693 | 2.065   | 1.922 | 1.038 | 3.006 | -0.706  | 0.047  | -0.959 | 1.192 |
| S4    | 2.490            | 2.388 | 1.258 | 3.672 | 1.779        | 1.736 | 1.038 | 2.693 | 2.134   | 2.062 | 1.148 | 3.182 | -1.712  | -2.035 | -0.776 | 2.770 |
| S5    | 1.660            | 1.550 | 1.283 | 2.608 | 1.637        | 2.194 | 1.185 | 2.983 | 1.649   | 2.231 | 1.022 | 5.310 | -1.373  | 0.447  | -1.027 | 1.771 |
| S6    | 1.667            | 2.179 | 1.174 | 2.985 | 1.642        | 2.389 | 1.341 | 3.194 | 1.654   | 2.284 | 1.258 | 3.088 | -0.818  | -0.875 | -1.142 | 1.655 |
| S7    | 2.230            | 2.829 | 1.323 | 3.837 | 2.244        | 2.333 | 1.247 | 3.469 | 2.237   | 2.581 | 1.285 | 3.649 | -1.893  | -2.306 | -1.088 | 3.175 |
| S8    | 2.662            | 2.669 | 1.288 | 3.983 | 2.321        | 2.329 | 1.258 | 3.521 | 2.491   | 2.499 | 1.273 | 3.751 | -2.307  | -2.338 | -0.828 | 3.387 |
| S9    | 2.633            | 2.328 | 2.328 | 3.715 | 2.688        | 2.312 | 1.255 | 3.761 | 2.661   | 2.320 | 1.229 | 3.738 | -2.307  | -1.936 | -0.654 | 3.082 |
| S10   | 2.025            | 2.500 | 1.311 | 3.473 | 2.461        | 2.053 | 1.166 | 3.410 | 2.243   | 2.276 | 1.238 | 3.427 | -1.623  | -0.596 | -1.186 | 2.096 |

**Table S9:** Barycentres of electron density loss ( $R_+$ ) /gain ( $R_-$ ), distance between two barycenters ( $D_{CT}$ ), RMSD of +ve/-ve parts, CT indices (H& t) and overlap integral of C+/C- of SPNCN-TPA and SPNCN-Cz.

| Blue<br>Fluorescent<br>emissive<br>materials | $R_+$ (Å) |       |        | $R_-$ (Å) |        |        | $D_{CT}$ (Å) | RMSD<br>of +ve<br>parts | RMSD<br>of -ve<br>parts | H / t<br>indices<br>(Å) | overlap<br>integral<br>of C+ / C- |
|----------------------------------------------|-----------|-------|--------|-----------|--------|--------|--------------|-------------------------|-------------------------|-------------------------|-----------------------------------|
|                                              | X         | y     | Z      | x         | y      | z      |              |                         |                         |                         |                                   |
| SPNCN-TPA                                    | -0.23     | -0.28 | -0.001 | -1.128    | -0.354 | -0.028 | 1.123        | 13.23                   | 13.41                   | 6.262/<br>5.633         | 0.9795                            |
| SPNCN-Cz                                     | -0.36     | -0.56 | -0.180 | -1.311    | -0.273 | -0.164 | 0.964        | 10.53                   | 11.23                   | 5.664/<br>4.725         | 0.9873                            |

**Table S10.** Comparison of device efficiencies with reported non-doped emitters.

| Emitter             | V <sub>on</sub> <sup>a</sup> (V) | L(cd/m <sup>2</sup> ) | EL(nm)     | $\eta_c$ (cd/A) | $\eta_p$ (lm/W) | CIE(x,y)            | ref              |
|---------------------|----------------------------------|-----------------------|------------|-----------------|-----------------|---------------------|------------------|
| <b>NSPI-TPA</b>     | <b>4.5</b>                       | <b>2013</b>           | <b>438</b> | <b>1.38</b>     | <b>1.29</b>     | <b>(0.15, 0.09)</b> | <b>This work</b> |
| <b>MNSPI-TPA</b>    | <b>4.3</b>                       | <b>2158</b>           | <b>447</b> | <b>1.68</b>     | <b>1.51</b>     | <b>(0.15, 0.08)</b> | <b>This work</b> |
| <b>SPNCN-TPA</b>    | <b>3.8</b>                       | <b>4362</b>           | <b>451</b> | <b>2.32</b>     | <b>2.01</b>     | <b>(0.15, 0.05)</b> | <b>This work</b> |
| <b>SPNCN-Cz</b>     | <b>3.5</b>                       | <b>4826</b>           | <b>443</b> | <b>2.56</b>     | <b>2.45</b>     | <b>(0.15,0.07)</b>  | <b>This work</b> |
| PPI                 | 3.8                              | 3307                  | 412        | 0.71            | 0.40            | (0.16,0.06)         | 66               |
| mTPA-PPI            | 3.2                              | 4065                  | 404        | 0.84            | 0.48            | (0.16,0.04)         | 66               |
| L-BPPI(50nm)        | 8.5                              | 70                    | 440        | 0.01            | -               | (0.16,0.11)         | 67               |
| L-BPPI(40nm)        | 6.5                              | 295                   | 440        | 0.13            | -               | (0.16,0.11)         | 67               |
| L-BPPI(30nm)        | 5.0                              | 420                   | 440        | 0.40            | -               | (0.16,0.10)         | 67               |
| L-BPPI(20nm)        | 4.5                              | 391                   | 440        | 0.68            | -               | (0.16,0.10)         | 67               |
| Z-BPPI(50nm)        | 6.5                              | 105                   | 440        | 0.07            | -               | (0.17,0.12)         | 67               |
| Z-BPPI(40nm)        | 5.0                              | 502                   | 440        | 0.34            | -               | (0.16,0.12)         | 67               |
| Z-BPPI(30nm)        | 4.5                              | 267                   | 440        | 0.45            | -               | (0.16,0.12)         | 67               |
| Z-BPPI(20nm)        | 5.0                              | 100                   | 440        | 0.31            | -               | (0.16,0.11)         | 67               |
| TPA-PIM             | -                                | 4510                  | 420        | 1.14            | 0.79            | (0.16,0.04)         | 68               |
| MADN (BUBD-10% )    | 7.8                              | -                     | 440        | 2.1             | -               | (0.15,0.10)         | 69               |
| CPPPI(M1)           | -                                | 3322                  | 420        | 0.65            | 0.48            | (0.16,0.05)         | 70               |
| PPICPPPI(M2)        | -                                | 4329                  | 428        | 1.53            | 0.86            | (0.16,0.05)         | 70               |
| PhBPI               | 2.8                              | -                     | 450        | 1.87            | 1.85            | -                   | 71               |
| Trilayer-TPBI       | 3.0                              | -                     | 468        | 2.96            | 2.00            | (0.15,0.19)         | 72               |
| Bilayer-TPBI        | 3.2                              | -                     | 468        | 2.03            | 1.00            | (0.15,0.15)         | 72               |
| TPA-BPI             | 2.8                              | -                     | 448        | 2.63            | 2.53            | (0.15,0.09)         | 73               |
| TPA-BPI             | 2.8                              | -                     | 448        | 1.83            | 1.58            | (0.15,0.09)         | 73               |
| TPA3TPAN(20nm)      | 8.9                              | 1867                  | 575        | 2.45            | 0.48            | -                   | 74               |
| TPA3TPAN(60nm)      | 8.0                              | 572                   | 579        | 0.35            | 0.12            | -                   | 74               |
| TPA3TPAN(80nm)      | 7.4                              | 3101                  | 580        | 6.16            | 2.64            | -                   | 74               |
| DTPA4TPAN(20nm)     | 11.0                             | 387                   | 582        | 0.35            | 0.06            | -                   | 74               |
| PEDOt-PSS :3(100nm) | 4                                | 2800                  | 460        | 0.61            | 0.14            | (0.15,0.14)         | 75               |
| PEDOt-PSS :3(50 nm) | 3                                | 10600                 | 407        | 1.68            | 1.10            | (0.16,0.13)         | 75               |
| PEDOt-PSS :4(40nm)  | 2.5                              | 21200                 | 392        | 1.90            | 1.55            | (0.16,0.14)         | 75               |
| 9TPAFSPO            | -                                | -                     | -          | 1.50            | 2.19            | (0.16, 0.07)        | 76               |
| MADN                | -                                | -                     | -          | 1.43            | 0.70            | (0.15, 0.10)        | 76               |
| BDMA                | -                                | -                     | -          | 2.20            | -               | (0.16, 0.12)        | 77               |
| P2                  | -                                | -                     | -          | 3.08            | 1.17            | (0.17, 0.19)        | 78               |
| SPI-TPA             | 4.5                              | 1050                  | -          | 0.43            | 0.93            | (0.18, 0.15)        | 79               |

## References

- [1] J. M. Foster and S. F. Boys, *Rev. Mod. Phys.*, 1960, **32**, 300-302.
- [2] S. F. Boys, *Rev. Mod. Phys.*, 1960, **32**, 296-299.
- [3] H. Fang, J. Bian, L. Li and W. J. Yang, *Chem. Phys.*, 2004, **120**, 9458-9466.
- [4] Q. A. Smith, K. Ruedenberg, M. K. Gordon and L. V. Splipchenko, *J. Chem. Phys.*, 2012, **136**, 244107-12.
- [66] Z. Wang, Y. Feng, H. Li, Z. Gao, X. Zhang, P. Lu, P. Chen, Y. Ma and S. Liu, *Phys. Chem. Chem. Phys.*, 2014, **16**, 10837-10843.
- [67] W. Li, L. Yao, H. Liu, Z. Wang, S. Zhang, R. Xiao, H. Zhang, P. Lu, B. Yang and Y. Ma, *J. Master. Chem. C*, 2014, **2**, 4733-4736.
- [68] M. F. Lin, L. Wang, W. K. Wong, K. W. Cheah, H. L. Tam, M.T. Lee and C. H. Chen, *Appl. Phys. Lett.*, 2006, **89**, 121913-121916.
- [69] Z. Gao, Y. Liu, Z. Wang, F. Shen, H. Liu, G. Sun, L. Yao, Y. Lv, P. Lu and Y. Ma, *Chem. Eur. J*, 2013, **19**, 2602-2605.
- [70] X. L. Li, X. Ouyang, D. Chen, X. Cai, M. Liu, Z. Ge, Y. Cao and S. J. Su, *Nanotechnology*, 2016, **27**, 124001-11.
- [71] Y. Zhang, T. W. Ng, F. Lu, Q. X. Tong, S. L. Lai, M. Y. Chan, H. L. Kwong and C. S. Lee, *Dyes and Pigments*, 2013, **98**, 190-194.
- [72] Y. Zhang, S. L. Lai, Q. X. Tong, M. F. Lo, T. W. Ng, M. Y. Chan, Z. C. Wen, J. He, K. S. Jeff, X. L. Tang, W. M. Liu, C. C. Ko, P. F. Wang and C. S. Lee, *Chem. Master.*, 2012, **24**, 61-70.
- [73] F. I. Wu, P. I. Shih, M. C. Yuan, A. K. Dixit, C. F. Shu, Z. M. Chung and E. W. G. Diau, *J. Mater. Chem.*, 2005, **15**, 4753-4760.
- [74] Y. L. Liao, C. Y. Lin, K. T. Wong, T. H. Hou and W. Y. Hung, *Org. Lett.*, 2007, **9**, 4511-4514.

- [75] D. G. Yu, F. C. Zhao, Z. Zhang, C. M. Han, H. Xu, J. Li and et al., *Chem. Commun.*, 2012, **48**, 6157-6159.
- [76] M. T. Lee, H. H. Chen, C. H. Liao, C. H. Tsai and C. H. Chen, *Appl. Phys. Lett.*, 2004, **85**, 3301-3303.
- [77] J. Y. Park, S. Y. Jung, J. Y. Lee and Y.G. Baek, *Thin Solid Films*, 2008, **516**, 2917-2921.
- [78] C. Tang, F. Liu, Y. J. Xia, J. Lin, L. H. Xie, G. Y. Zhong and et al., *Org. Electron.*, 2006, **7**, 155-162.
- [79] V. Thanikachalam P. Jeeva and J. Jayabharathi, *J. Phys Org Chem.*, 2017, **3695**, 1-13.
